# Supplementary material for: Exploring Variability in Rifampicin Plasma Exposure and Development of Anti-Tuberculosis Drug-Induced Liver Injury among Patients with Pulmonary Tuberculosis from the Pharmacogenetic Perspective
Source: MDPI journal article supplement (doi:10.3390/pharmaceutics16030388), 2024-03-12
Supplement: s1 [file s1]

**Table S1** Sequences of the primers specifically designed for this study and used in the amplification step in the NGS workflow

| Primer name | Sequence (5'–3')          | Genomic coordinates <sup>a</sup> | Product size, bp |
|-------------|---------------------------|----------------------------------|------------------|
| AADAC_1F    | AATCGCAGGGTGGAACTT        | chr3:151813557–151813576         | 5347             |
| AADAC_1R    | TAGGACTCAGGTGGGTTAGGT     | chr3:151818883–151818903         |                  |
| AADAC_4F    | GTAATCACCTGCTGTTCGCT      | chr3:151816407–151816426         | 4507             |
| AADAC_4R    | AAGCCTAGCACTCACTTGCA      | chr3:151820893–151820913         |                  |
| AADAC_5F    | CTGGGATGCGGGCAATGTTA      | chr3:151824444–151824463         | 5101             |
| AADAC_5R    | TTACCTCAAATACAGCTCTTCTGC  | chr3:151829521–151829544         |                  |
| SLCO1B1_3F  | TCAGAGCTGTGATAGCCGTTT     | chr12:21129487–21129507          | 1886             |
| SLCO1B1_2R  | AGGGCTCAGAATGTAAGCGTG     | chr12:21131350–21131370          |                  |
| SLCO1B1_5F  | GATGGTGGTAAGGTCAAGCAA     | chr12:21140920–21140940          | 1437             |
| SLCO1B1_5R  | CTGAGTCTTGGCTTCTCATTTAGC  | chr12:21142333–21142356          |                  |
| SLCO1B1_6F  | CCTCCAGTTAGCCAATGCT       | chr12:21172283–21172302          | 4102             |
| SLCO1B1_6R  | TTCACACACACGCTCTAATGTATG  | chr12:21176361–21176384          |                  |
| SLCO1B1_8F  | TCTATTCGCGCAACCTCCAAG     | chr12:21176049–21176069          | 1141             |
| SLCO1B1_9R  | GCAGTTGGCCCTGTTCAATC      | chr12:21177170–21177189          |                  |
| SLCO1B1_10F | GCTTGAGGTGATCTTCTGTGTGT   | chr12:21195954–21195976          | 1504             |
| SLCO1B1_10R | ACTGAACATTGCCATACGCC      | chr12:21179486–21179505          |                  |
| SLCO1B1_11F | TATGTTGAGCCAGGGAATAGAGC   | chr12:21195954–21195976          | 5470             |
| SLCO1B1_11R | AGGCTAGGTTACTGGGAGTCA     | chr12:21201403–21201423          |                  |
| SLCO1B1_12F | CCAACAAATATCCTCAGCCACAC   | chr12:21201747–21201769          | 4761             |
| SLCO1B1_12R | AAGGGTAGTGATCCCAGAGC      | chr12:21206488–21206507          |                  |
| SLCO1B1_13F | CCCTCTTTGCACACTAGCGA      | chr12:21215995–21216014          | 1669             |
| SLCO1B1_13R | TTTACCCTGAGAGATGCAAGGC    | chr12:21217642–21217663          |                  |
| SLCO1B1_14F | TTCAGAGGCATAATAAAGTCTGTTC | chr12:21221999–21222023          | 3395             |
| SLCO1B1_14R | TTCCAGATGCCCATGCAGTT      | chr12:21225374–21225393          |                  |
| SLCO1B1_15F | GAAGGCCAGAGGCAACTAGA      | chr12:21238757–21238776          | 2332             |
| SLCO1B1_15R | AGAGACATACCAGTCTGATGATTGA | chr12:21241064–21241088          |                  |
| SLCO1B3_1F  | ACTCAACAGAGGGGTGTTTGG     | chr12:20809310–20809330          | 1960             |
| SLCO1B3_1R  | CCCTCACCTAAATCAAACGA      | chr12:20811249–20811269          |                  |
| SLCO1B3_4F  | GGGCTGCTTATTACCTTGAGACCAC | chr12:20812980–20813004          | 4278             |
| SLCO1B3_4R  | TCTTACCCAGAAACACAGGCAAC   | chr12:20817234–20817257          |                  |
| SLCO1B3_5F  | TCTTTGCCTCCACAAAGTTCTAT   | chr12:20854595–20854617          | 1505             |
| SLCO1B3_5R  | TGAGCCTGGGAGGTAAACAAG     | chr12:20856079–20856099          |                  |
| SLCO1B3_7F  | TGATTCTATGGCTGCAACATGC    | chr12:20857588–20857609          | 4341             |
| SLCO1B3_7R  | TGGATGTCATGGCTGTGATTATGA  | chr12:20861905–20861928          |                  |
| SLCO1B3_10F | CCTTAGAACTCACAGAGCGGT     | chr12:20860454–20860474          | 4821             |
| SLCO1B3_10R | AACAACCTCAGGCAGACTTCAGG   | chr12:20865253–20865274          |                  |
| SLCO1B3_11F | CACATTCGCTCTGTGTTAAGCC    | chr12:20874209–20874230          | 4452             |
| SLCO1B3_11R | CCAGAAGCCTGTTCCAATGCT     | chr12:20878640–20878660          |                  |
| SLCO1B3_12F | AAGCATTGGAACAGGCTTCTG     | chr12:20878639–20878659          | 5410             |
| SLCO1B3_12R | GCTGTGGGTGAATTGAAAGCA     | chr12:20884028–20884048          |                  |
| SLCO1B3_13F | AGAGGTCTGCTAAGAATTACTCCTG | chr12:20898039–20898063          | 4662             |
| SLCO1B3_13R | CCTTGCTGTTGAACTTTGCTTACA  | chr12:20902677–20902700          |                  |
| SLCO1B3_14F | AGACAGCTGGGGTTTAGTTTCTG   | chr12:20915785–20915807          | 2529             |
| SLCO1B3_14R | TACCATGGTGGTCTATCAAGGA    | chr12:20918292–20918313          |                  |
| ABCB1_1HF   | TAGTCCTACAGCTTCACTACTGT   | chr7:87501556–87501578           | 4374             |
| ABCB1_1HR   | GCCACGTCAGCTCTGGATAC      | chr7:87505910–87505929           |                  |
| ABCB1_2F    | ACCTCAAATCCAGCTCACAGTA    | chr7:87505386–87505407           | 4303             |
| ABCB1_2R    | GGTTGAAACACAGGAAACATGACAG | chr7:87509664–87509688           |                  |

|            |                           |                          |      |
|------------|---------------------------|--------------------------|------|
| ABCB1 3F   | CTGTCATTGCTGACCACCATC     | chr7:87514849–87514869   | 2231 |
| ABCB1 3R   | CTATTAGAGGCAAAGCTCTCTGGT  | chr7:87517056–87517079   |      |
| ABCB1 4F   | GAGGCAGAATCTTACCCACCTC    | chr7:87518667–87518688   | 2973 |
| ABCB1 4R   | AACCCAAAGTCCCTTGAGCG      | chr7:87521620–87521639   |      |
| ABCB1 5F   | GCATGAGGTTTGTCCCCTACA     | chr7:87529955–87529975   | 2085 |
| ABCB1 5R   | ATGCTTCAGACTCCCTCTGGAA    | chr7:87532018–87532039   |      |
| ABCB1 6F   | TTCACTCACTTTATTCCAGCCACT  | chr7:87535301–87535324   | 2243 |
| ABCB1 6R   | AGCGACAGCTCCGTTCTACT      | chr7:87537524–87537543   |      |
| ABCB1 7F   | GGGAAGAAACACTCGTGCCC      | chr7:87538903–87538922   | 2808 |
| ABCB1 7R   | TGACTCCAAGAGGGAATCCG      | chr7:87541691–87541710   |      |
| ABCB1 8F   | AGAACAGTGCATTCTCAAGCCA    | chr7:87543745–87543766   | 3372 |
| ABCB1 8R   | GAGCATTGGGAAAGTTACAAAGGT  | chr7:87547093–87547116   |      |
| ABCB1 9F   | AGTGGCATTCAACACCTGGAA     | chr7:87548914–87548934   | 1748 |
| ABCB1 9R   | GTCACTTTATCCAGCTCTCCACA   | chr7:87550639–87550661   |      |
| ABCB1 10F  | TCTAGCTCGCATGGGTCATC      | chr7:87550147–87550166   | 1767 |
| ABCB1 10R  | AACTGGGTCTTCTGACTCCTCT    | chr7:87551892–87551913   |      |
| ABCB1 11F  | AAAGTTTAGCTGGCTGCCCTA     | chr7:87552422–87552442   | 2853 |
| ABCB1 11R  | GCAGGGAGTTGCGATTAAGA      | chr7:87555255–87555274   |      |
| ABCB1 12F  | CCTTTGAACTATGGCACTTAACCAT | chr7:87560269–87560293   | 2561 |
| ABCB1 12R  | TCACACCTGGCCTTTTCATATCC   | chr7:87562807–87562829   |      |
| ABCB1 13F  | ACATACTGGGCCAATTTCTCTACTG | chr7:87565314–87565338   | 2378 |
| ABCB1 13R  | GAAGGGCCACTATTTGATTCGTT   | chr7:87567669–87567691   |      |
| ABCB1 14F  | ACCTACACGTACCTTTGGACA     | chr7:87569418–87569438   | 1500 |
| ABCB1 14R  | GCCACTAAATGTAACTATGACTCC  | chr7:87570893–87570917   |      |
| ABCB1 15F  | AGCAGTAAGAGAGCTAACGCC     | chr7:87583920–87583940   | 2867 |
| ABCB1 15R  | CACTCGGCAGTCCAGTACC       | chr7:87586768–87586786   |      |
| ABCB1 16F  | CACCAAATTCCAAAGGGCG       | chr7:87594679–87594698   | 2177 |
| ABCB1 16R  | TGCCTTTACTGGGAATTGGGT     | chr7:87596835–87596855   |      |
| ABCB1 17F  | GCCATTTACCGGAAGCAAGA      | chr7:87599424–87599443   | 4211 |
| ABCB1 17R  | CCCAGTGAGTTTGGCTGAAATG    | chr7:87603613–87603634   |      |
| ABCB1 18BF | AGGTTCTATTGGTCGGAGCTG     | chr7:87711806–87711826   | 3372 |
| ABCB1 18BR | CCCTCATCCTTTATAGCATTTAC   | chr7:87715154–87715177   |      |
| NR1I2 1F   | TGAACTGAGCAGCCACCAAAT     | chr3:119778867–119778887 | 4982 |
| NR1I2 1R   | AGAACAACATGGCAACAGATAGG   | chr3:119783826–119783848 |      |
| NR1I2 2F   | TCCATGATCCGACCCAGACA      | chr3:119806918–119806937 | 3836 |
| NR1I2 2R   | ACACCTAGCCTTTTCCGCAT      | chr3:119810734–119810753 |      |
| NR1I2 3F   | ATGCGGAAAAGGCTAGGTGTT     | chr3:119810734–119810754 | 2819 |
| NR1I2 3R   | ACCTGGCACCATCCCTAATC      | chr3:119813533–199813533 |      |
| NR1I2 4F   | CAAGCTCAGTGGGTGGAGTT      | chr3:119814732–119814751 | 1421 |
| NR1I2 4R   | TGGCCTTAACCCTTCATGGC      | chr3:119816133–199816152 |      |
| NR1I2 5F   | CCCTAACCTCCACAACGACTC     | chr3:119816398–119816418 | 3263 |
| NR1I2 5R   | CCTATGTGAACTCTTCAGGGCAT   | chr3:119819638–119819660 |      |

<sup>a</sup> Reference genome: GRCh38.p13, GCF 000001405.39.
