# Supplementary material for: Exploring Variability in Rifampicin Plasma Exposure and Development of Anti-Tuberculosis Drug-Induced Liver Injury among Patients with Pulmonary Tuberculosis from the Pharmacogenetic Perspective
Source: MDPI journal article supplement (doi:10.3390/pharmaceutics16030388), 2024-03-12
Supplement: s1 [file s1]

**Table S2** Characterisation of the study population stratified by RIF plasma concentration 2 hours post-dose, and comparison of patient characteristics between the patients with normal exposure ( $\geq 8 \mu\text{g/mL}$ ) and underexposure ( $< 8 \mu\text{g/mL}$ ) 2 hours post-dose

| Characteristic                |               | RIF exposure <sup>a</sup> |                  |                        |                |                           |
|-------------------------------|---------------|---------------------------|------------------|------------------------|----------------|---------------------------|
|                               |               | Normal exposure (n = 4)   |                  | Underexposure (n = 42) |                | <i>p</i> -value           |
|                               |               | No./Total (%)             | Median (IQR)     | No./Total (%)          | Median (IQR)   |                           |
| Biological sex                | Male          | 4/4 (100.0)               |                  | 31/42 (73.8)           |                | 0.559 <sup>c</sup>        |
|                               | Female        | 0/4 (0.0)                 |                  | 11/42 (26.2)           |                |                           |
| Age, years                    | Overall       |                           | 45 (36–52)       |                        | 47 (38–56)     | 0.721 <sup>d</sup>        |
|                               | < 60 years    | 4/4 (100.0)               |                  | 37/42 (88.1)           |                | 1.000 <sup>c</sup>        |
|                               | ≥ 60 years    | 0/4 (0.0)                 |                  | 5/42 (11.9)            |                |                           |
| Body weight, kg               | Overall       |                           | 54 (51–60)       |                        | 65 (57–74)     | <b>0.021</b> <sup>d</sup> |
| BMI <sup>b</sup>              | Underweight   | 2/4 (50.0)                |                  | 9/42 (21.4)            |                | 0.470 <sup>c</sup>        |
|                               | Normal weight | 2/4 (50.0)                |                  | 25/42 (59.5)           |                |                           |
|                               | Overweight    | 0 (0.0)                   |                  | 8/42 (19.0)            |                |                           |
| Smoking status                | Smoker        | 4/4 (100.0)               |                  |                        | 31/42 (73.8)   | 0.559 <sup>c</sup>        |
|                               | Non-smoker    | 0/4 (0.0)                 |                  |                        | 11/42 (26.2)   |                           |
| Increased alcohol consumption | Yes           | 1/4 (25.0)                |                  | 14/42 (33.3)           |                | 1.000 <sup>c</sup>        |
|                               | No            | 3/4 (75.0)                |                  | 28/42 (66.7)           |                |                           |
| RIF dose, mg/kg               | Overall       |                           | 11.2 (10.1–11.7) |                        | 9.2 (8.1–10.6) | <b>0.021</b> <sup>d</sup> |

<sup>a</sup> Based on the RIF  $C_{\text{max}}$  values at 2h, according to the reference range suggested by Alsultan et al. [15]. Normal exposure:  $\geq 8 \mu\text{g/mL}$ ; underexposure:  $< 8 \mu\text{g/mL}$ .

<sup>b</sup> According to the World Health Organization recommendations [56], a patient was classified as underweight if the BMI was  $< 18.5 \text{ kg/m}^2$  and overweight if the BMI was  $\geq 25.0 \text{ kg/m}^2$ .

<sup>c</sup> Group comparison was performed using the Fisher's exact test.

<sup>d</sup> Group comparison was performed using the Mann-Whitney U test.

For all tests, a *p*-value of  $< 0.05$  was considered statistically significant.

Abbreviations: RIF – rifampicin; BMI – body mass index.
