# Supplementary material for: Exploring Variability in Rifampicin Plasma Exposure and Development of Anti-Tuberculosis Drug-Induced Liver Injury among Patients with Pulmonary Tuberculosis from the Pharmacogenetic Perspective
Source: MDPI journal article supplement (doi:10.3390/pharmaceutics16030388), 2024-03-12
Supplement: s1 [file s1]

**Table S3** Characterisation of the study population stratified by DILI status and comparison of patient characteristics between DILI and non-DILI groups

|                                                                           |               | DILI group (n = 6) <sup>b</sup> |                             | Non-DILI group (n = 40) |                            | p-value                     |
|---------------------------------------------------------------------------|---------------|---------------------------------|-----------------------------|-------------------------|----------------------------|-----------------------------|
|                                                                           |               | No./Total (%)                   | Median (IQR)                | No./Total (%)           | Median (IQR)               |                             |
| <i>Demographic and anthropometric characteristics</i>                     |               |                                 |                             |                         |                            |                             |
| Biological sex                                                            | Male          | 3/6 (50.0)                      |                             | 32/40 (80.0)            |                            | 0.138 <sup>e</sup>          |
|                                                                           | Female        | 3/6 (50.0)                      |                             | 8/40 (20.0)             |                            |                             |
| Age, years                                                                | Overall       |                                 | 50 (44–58)                  |                         | 46 (35–55)                 | 0.345 <sup>f</sup>          |
|                                                                           | < 60 years    | 5/6 (83.3)                      |                             | 36/40 (90.0)            |                            | 0.520 <sup>e</sup>          |
|                                                                           | ≥ 60 years    | 1/6 (16.7)                      |                             | 4/40 (10.0)             |                            |                             |
| Body weight, kg                                                           | Overall       |                                 | 65 (52–69)                  |                         | 64 (55–74)                 | 0.453 <sup>f</sup>          |
| BMI <sup>a</sup>                                                          | Underweight   | 1 (16.7)                        |                             | 10 (25.0)               |                            | 1.000 <sup>e</sup>          |
|                                                                           | Normal weight | 4 (66.7)                        |                             | 23 (57.5)               |                            |                             |
|                                                                           | Overweight    | 1 (16.7)                        |                             | 7 (17.5)                |                            |                             |
| <i>Self-reported lifestyle factors</i>                                    |               |                                 |                             |                         |                            |                             |
| Smoking status                                                            | Smoker        | 4 (66.7)                        |                             | 31 (77.5)               |                            | 0.619 <sup>e</sup>          |
|                                                                           | Non-smoker    | 2 (33.3)                        |                             | 9 (22.5)                |                            |                             |
| Increased alcohol consumption                                             | Yes           | 3 (50.0)                        |                             | 12 (30.0)               |                            | 0.375 <sup>e</sup>          |
|                                                                           | No            | 3 (50.0)                        |                             | 28 (70.0)               |                            |                             |
| <i>Baseline blood biochemical parameters</i>                              |               |                                 |                             |                         |                            |                             |
| ALAT, U/L                                                                 |               |                                 | 22 (13–52)                  |                         | 17 (12–23)                 | 0.329 <sup>f</sup>          |
| ASAT, U/L                                                                 |               |                                 | 18 (15–80) <sup>c</sup>     |                         | 18 (15–27) <sup>d</sup>    | 0.914 <sup>f</sup>          |
| Total bilirubin, μmol/L                                                   |               |                                 | 7.4 (5.0–12.5) <sup>c</sup> |                         | 6.3 (5.2–8.4)              | 0.661 <sup>f</sup>          |
| Conjugated bilirubin, μmol/L                                              |               |                                 | 3.4 (2.2–5.9) <sup>c</sup>  |                         | 3.1 (2.4–4.0) <sup>d</sup> | 1.000 <sup>f</sup>          |
| <i>Blood biochemical parameters after 10–12 days of anti-TB treatment</i> |               |                                 |                             |                         |                            |                             |
| ALAT, U/L                                                                 |               |                                 | 247 (157–972)               |                         | 16 (13–21)                 | < <b>0.001</b> <sup>f</sup> |
| ASAT, U/L                                                                 |               |                                 | 230 (125–722)               |                         | 21 (17–26)                 | < <b>0.001</b> <sup>f</sup> |
| Total bilirubin, μmol/L                                                   |               |                                 | 6.1 (4.0–15.8)              |                         | 4.6 (3.1–6.0)              | 0.108 <sup>f</sup>          |
| Conjugated bilirubin, μmol/L                                              |               |                                 | 3.4 (3.1–13.6)              |                         | 2.5 (1.7–3.5)              | 0.055 <sup>f</sup>          |
| <i>Rifampicin-related data</i>                                            |               |                                 |                             |                         |                            |                             |
| RIF dose, mg/kg                                                           |               |                                 | 9.3 (8.7–11.6)              |                         | 9.4 (8.1–10.9)             | 0.453 <sup>f</sup>          |
| C <sub>max</sub> , μg/mL                                                  |               |                                 | 2.15 (0.31–4.55)            |                         | 2.09 (0.40–5.96)           | 0.987 <sup>f</sup>          |
| AUC <sub>0–6h</sub> , μg × h/mL                                           |               |                                 | 14.22 (9.43–22.81)          |                         | 12.75 (5.43–22.53)         | 0.622 <sup>f</sup>          |

<sup>a</sup> According to WHO recommendations [56], a patient was classified as underweight if the BMI was  $< 18.5 \text{ kg/m}^2$  and overweight if the BMI was  $\geq 25.0 \text{ kg/m}^2$ .

<sup>b</sup> According to the CTLD clinical laboratory, DILI was defined as follows: ALAT  $> 60 \text{ U/L}$  for males and  $> 45 \text{ U/L}$  for females and ASAT  $> 55 \text{ U/L}$  for males and  $> 45 \text{ U/L}$  for females and/or total bilirubin  $> 19.0 \mu\text{mol/L}$  and/or conjugated bilirubin  $> 3.4 \mu\text{mol/L}$ .

<sup>c</sup> Data were available for 5 patients.

<sup>d</sup> Data were available for 39 patients.

<sup>e</sup> Group comparison was performed using the Fisher's exact test.

<sup>f</sup> Group comparison was performed using the Mann-Whitney U test.

For all tests, a  $p$ -value of  $< 0.05$  was considered statistically significant.

Abbreviations: WHO – World Health Organization; BMI – body mass index; CTLD – Riga East University Hospital, Centre of Tuberculosis and Lung Diseases; DILI – drug-induced liver injury; ALAT – alanine aminotransferase; ASAT – aspartate aminotransferase; RIF – rifampicin;  $C_{\text{max}}$  – peak plasma concentration measured 2 hours post-dose;  $\text{AUC}_{0-6\text{h}}$  – area under the time-concentration curve from 0 to 6 hours post-dose.
